# Supplementary material for: Beyond valence: a meta-analysis of discrete emotions in firm-customer encounters
Source: Springer Nature journal article supplement (doi:10.1007/s11747-019-00707-0), 2019-12-09
Supplement: MOESM1 [file 17493112]

## APPENDICES

### Appendix A Studies included in meta-analysis

Albrecht, A. K., Walsh, G., & Beatty, S. E. (2017). Perceptions of group versus individual service failures and their effects on customer outcomes: the role of attributions and customer entitlement. *Journal of Service Research, 20*, 188–203.

Allen, C. T., Machleit, K. A., Kleine, S. S., & Notani, A. S. (2005). A place for emotion in attitude models. *Journal of Business Research, 58*, 494–499.

Babin, B. J., & Babin, L. (2001). Seeking something different? A model of schema typicality, consumer affect, purchase intentions and perceived shopping value. *Journal of Business Research, 54*, 89–96.

Babin, B. J., & Darden, W. R. (1996). Good and bad shopping vibes: spending and patronage satisfaction. *Journal of Business Research, 35*, 201–206.

Bogliacino, F., Codagnone, C., Veltri, G. A., Chakravarti, A., Ortoleva, P., Gaskell, G., et al. (2015). Pathos & ethos: emotions and willingness to pay for tobacco products. *PLoS ONE, 10*, 1–25.

Bonifield, C., & Cole, C. A. (2007). Affective responses to service failure: anger, regret, and retaliatory versus conciliatory responses. *Marketing Letters, 18*, 85–99.

Bonifield, C., & Cole, C. A. (2008). Better him than me: social comparison theory and service recovery. *Journal of the Academy of Marketing Science, 36*, 565–577.

Bougie, R., Pieters, R., & Zeelenberg, M. (2003). Angry customers don't come back, they get back: the experience and behavioral implications of anger and dissatisfaction in services. *Journal of the Academy of Marketing Science, 31*, 377–393.

- Burns, D. J., & Neisner, L. (2006). Customer satisfaction in a retail setting. *International Journal of Retail & Distribution Management*, 34, 49–66.
- Cai, S., & Xu, Y., (2006). Effects of outcome, process and shopping enjoyment on online consumer behaviour. *Electronic Commerce Research and Applications*, 5, 272–281.
- Cheng, Y.-H., Chang, C.-J., Chuang, S.-C., & Liao Y.-W. (2015). Guilt no longer a sin: the effect of guilt in the service recovery paradox. *Journal of Service Theory and Practice*, 25, 836–853.
- Childers, T., Carr, C., Peck, J., & Carson, S. (2001). Hedonic and utilitarian motivations for online retail shopping behavior. *Journal of Retailing*, 77, 511–535.
- Chong, Y. S., & Ahmed, P. K. (2017). On happiness, sadness or indifference: investigating the carryover effect of outcome valence in service perceptions. *Journal of Service Theory and Practice*, 27, 69–86.
- Coleman, N. V., Williams, P., Morales, A. C., & White, A. E. (2017). Attention, attitudes, and action: when and why incidental fear increases consumer choice. *Journal of Consumer Research*, 44, 283–312.
- Cornwell, T., Jahn, S., Xie, H., & Suk Suh, W. (2018). Feeling that ingroup feeling at a sponsored sporting event: links to memory and future attendance. *Journal of Sport Management*, 32, 1–12.
- Derbaix, C., & Vanhamme, J. (2003). Inducing word-of-mouth by eliciting surprise – a pilot investigation. *Journal of Economic Psychology*, 24, 99–116.
- Éthier, J., Hadaya, P., Talbot, J., & Cadieux, J. (2008). Interface design and emotions experienced on B2C Web sites: empirical testing of a research model. *Computers in*

*Human Behavior*, 24, 2771–2791.

Fazal-e-Hasan, S., Lings, I. N., Mortimer, G., & Neale, L. (2017a). How gratitude influences customer word-of-mouth intentions and involvement: the mediating role of affective commitment. *Journal of Marketing Theory and Practice*, 25, 200–211.

Fazal-e-Hasan, S., Lings, I., Neale, L., & Mortimer, G. (2014). The role of customer gratitude in making relationship marketing investments successful. *Journal of Retailing and Consumer Services*, 21, 788–796.

Fazal-e-Hasan, S., Mortimer, G., Lings, I., & Neale, L. (2017b). Examining the antecedents and consequences of gratitude. *Journal of Services Marketing*, 31, 34–47.

Finn, A. (2005). Reassessing the foundations of customer delight. *Journal of Service Research*, 8, 103–116.

Folkes, V. S., Koletsky, S., & Graham, J. L. (1987). A field study of causal inferences and consumer reaction: the view from the airport. *Journal of Consumer Research*, 13, 534–539.

Friman, M. (2004). The structure of affective reactions to critical incidents. *Journal of Economic Psychology*, 25, 331–353.

Garry, T. (2007). Consumer sophistication and the role of emotion on satisfaction judgments within credence services. *Journal of Consumer Behaviour*, 6, 383–397.

Garry, T. (2008). Affect and the role of corporate customer expertise within legal services. *Journal of Services Marketing*, 22, 292–302.

Gelbrich, K. (2009). Beyond just being dissatisfied: how angry and helpless customers react

- to failures when using self-service technologies. *Schmalenbach Business Review*, 61, 40–59.
- Gelbrich, K. (2010). Anger, frustration, and helplessness after service failure: coping strategies and effective informational support. *Journal of the Academy of Marketing Science*, 38, 567–585.
- Goldsmith, K., Cho, E. K., & Dhar, R. (2012). When guilt begets pleasure: the positive effect of a negative emotion. *Journal of Marketing Research*, 49, 872–881.
- Gountas, J., & Gountas, S. (2006). Personality orientations, emotional states, customer satisfaction, and intention to repurchase. *Journal of Business Research*, 60, 72–75.
- Grappi, S., Romani, S., & Bagozzi, R. P. (2013). The effects of company offshoring strategies on consumer responses. *Journal of the Academy of Marketing Science*, 41, 683–704.
- Grappi, S., Romani, S., & Bagozzi, R. P. (2015). Consumer stakeholder responses to reshoring strategies. *Journal of the Academy of Marketing Science*, 43, 453–471.
- Han, H., Back, K. J., & Barrett, B. (2009). Influencing factors on restaurant customers' revisit intention: the roles of emotions and switching barriers. *International Journal of Hospitality Management*, 28, 563–572.
- Hassanein, K., & Head, M. (2007). Manipulating perceived social presence through the web interface and its impact on attitude towards online shopping. *International Journal of Human Computer Studies*, 65, 689–708.
- Hille, P., Walsh, G., & Cleveland, M. (2015). Consumer fear of online identity theft: scale development and validation. *Journal of Interactive Marketing*, 30, 1–19.

- Hou, M., Wu, X., & Hu, Z. (2013). Personnel service, consumption emotion, and patronage intention in department stores. *International Business Research*, *6*, 6–22.
- Huang, C.-C. (2017). The impacts of brand experiences on brand loyalty: mediators of brand love and trust. *Management Decision*, *55*, 915–934.
- Hui, M., & Bateson, J. E. G. (1991). Perceived crowding on control and and consumer the effects choice of the experience. *Journal of Consumer Research*, *18*, 174–184.
- Hwang, Y., & Kim, D. J. (2007). Customer self-service systems: the effects of perceived Web quality with service contents on enjoyment, anxiety, and e-trust. *Decision Support Systems*, *43*, 746–760.
- Jiang, Y., & Lu Wang, C. (2006). The impact of affect on service quality and satisfaction: the moderation of service contexts. *Journal of Services Marketing*, *20*, 211–218.
- Johnson, M. D., Lervik, L., Tor, O., Andreassen, W., Olsen, L. L., & Andreassen, T. W. (2009). Joy and disappointment in the hotel experience: managing relationship segments. *Managing Service Quality: An International Journal*, *19*, 4–30.
- Johnson, M., Zinkhan, G. M., & Ayala, G. S. (1998). The impact of outcome, competency and affect on service referral. *Journal of Services Marketing*, *12*, 397–415.
- Joireman, J., Smith, D., Liu, R. L., & Arthurs, J. (2015). It's all good: corporate social responsibility reduces negative and promotes positive responses to service failures among value-aligned customers. *Journal of Public Policy & Marketing*, *34*, 32–49.
- Kalamas, M., Laroche, M., & Makdessian, L. (2008). Reaching the boiling point: consumers' negative affective reactions to firm-attributed service failures. *Journal of Business Research*, *61*, 813–824.

- Kim, W. G., & Moon, Y. J. (2009). Customers' cognitive, emotional, and actionable response to the servicescape: a test of the moderating effect of the restaurant type. *International Journal of Hospitality Management*, 28, 144–156.
- Kourouthanassis, P. E., Pappas, I. O., Bardaki, C., & Giannakos, M. N. (2016). A matter of trust and emotions: a complexity theory approach to explain the adoption of e-government services. *Twenty-Fourth European Conference on Information Systems (ECIS)*, 1–15.
- Krampf, R., Ueltschy, L., & D'Amico, M. (2003). The contribution of emotion to consumer satisfaction in the service setting. *Marketing Management Journal*, 13, 32–52.
- Kuo, Y. F., & Wu, C. M. (2012). Satisfaction and post-purchase intentions with service recovery of online shopping websites: perspectives on perceived justice and emotions. *International Journal of Information Management*, 32, 127–138.
- Ladhari, R., Brun, I., & Morales, M. (2008). Determinants of dining satisfaction and post-dining behavioral intentions. *International Journal of Hospitality Management*, 27, 563–573.
- Lastner, M. M., Folse, J. A. G., Mangus, S. M., & Fennell, P. (2016). The road to recovery: overcoming service failures through positive emotions. *Journal of Business Research*, 69, 4278–4286.
- Li, H., Sarathy, R., & Xu, H. (2011). The role of affect and cognition on online consumers' decision to disclose personal information to unfamiliar online vendors. *Decision Support Systems*, 51, 434–445.
- Liljander, V., & Strandvik, T. (1997). Emotions in service satisfaction. *International Journal*

*of Service Industry Management*, 8, 148–169.

Loureiro, S. M. C., & Roschk, H. (2014). Differential effects of atmospheric cues on emotions and loyalty intention with respect to age under online/offline environment. *Journal of Retailing and Consumer Services*, 21, 211–219.

Louro, M. J., Pieters, R., & Zeelenberg, M. (2005). Negative returns on positive emotions: the influence of pride and self-regulatory goals on repurchase decisions. *Journal of Consumer Research*, 31, 833–840.

Ludwig, N. L., Heidenreich, S., Kraemer, T., & Gouthier, M. (2017). Customer delight: universal remedy or a double-edged sword? *Journal of Service Theory and Practice*, 27, 22–45.

Machleit, K. A., & Eroglu, S. A. (2000). Describing and measuring emotional response to shopping experience. *Journal of Business Research*, 49, 101–111.

Mano, H. (1999). The influence of pre-existing negative affect on store purchase intentions. *Journal of Retailing*, 75, 149–172.

Mattila, A. S., & Ro, H. (2008). Discrete negative emotions and customer dissatisfaction responses in a casual restaurant setting. *Journal of Hospitality and Tourism Research*, 32, 89–107.

Menon, K., & Dubé, L. (2004). Service provider responses to anxious and angry customers: different challenges, different payoffs. *Journal of Retailing*, 80, 229–237.

Menon, S., & Kahn, B. (2002). Cross category effects of induced arousal and pleasure on the internet shopping experience. *Journal of Retailing*, 78, 31–40.

- Nyer, P. U. (1997a). Modeling the cognitive antecedents of post-consumption emotions. *Journal of Consumer Satisfaction Dissatisfaction and Complaining Behavior*, 10, 80–90.
- Nyer, P. U. (1997b). A study of the relationships between cognitive appraisals and consumption emotions. *Journal of the Academy of Marketing Science*, 25, 296–304.
- Oliver, R. L. (1993). Cognitive, affective and attribute bases of the satisfaction response. *Journal of Consumer Research*, 20, 418–430.
- Ou, Y. C., & Verhoef, P. C. (2017). The impact of positive and negative emotions on loyalty intentions and their interactions with customer equity drivers. *Journal of Business Research*, 80, 106–115.
- Palmatier, R. W., Jarvis, C. B., Bechhoff, J. R., & Kardes, F. R. (2009). The role of customer gratitude in relationship marketing. *Journal of Marketing*, 73, 1–18.
- Pappas, I., Kourouthanassis, P., & Papavlasopoulou, S. (2014a). Towards emotional satisfaction in social network services use. *Mediterranean Conference on Information Systems (MCIS)*, 1–10.
- Pappas, I. O., Giannakos, M. N., Kourouthanassis, P. E., & Chrissikopoulos, V. (2013). Assessing emotions related to privacy and trust in personalized services. *IFIP Advances in Information and Communication Technology*, 399, 38–49.
- Pappas, I. O., Kourouthanassis, P. E., Giannakos, M. N., & Chrissikopoulos, V. (2014b). Shiny happy people buying: the role of emotions on personalized e-shopping. *Electronic Markets*, 24, 193–206.
- Pappas, I. O., Kourouthanassis, P. E., Giannakos, M. N., & Chrissikopoulos, V. (2016). Explaining online shopping behavior with fsQCA: the role of cognitive and affective



- perceptions. *Journal of Business Research*, 69, 794–803.
- Patterson, P. G., Brady, M. K., & McColl-Kennedy, J. R. (2016). Geysers or bubbling hot springs? A cross-cultural examination of customer rage from eastern and western perspectives. *Journal of Service Research*, 19, 243–259.
- Porat, T., & Tractinsky, N. (2012). It's a pleasure buying here: the effects of web-store design on consumers' emotions and attitudes. *Human-Computer Interaction*, 27, 235–276.
- Pullman, M. E., & Gross, M. A. (2003). Welcome to your experience: where you can check out anytime you'd Like, but you can never leave. *Journal of Business & Management*, 9, 215–232.
- Sánchez-García, I., & Currás-Pérez, R. (2011). Effects of dissatisfaction in tourist services: the role of anger and regret. *Tourism Management*, 32, 1397–1406.
- Selnes, F., & Gønhaug, K. (2000). Effects of supplier reliability and benevolence in business marketing. *Journal of Business Research*, 49, 259–271.
- Shamdasani, P., Mukherjee, A., & Malhotra, N. (2008). Antecedents and consequences of service quality in consumer evaluation of self-service internet technologies. *The Service Industries Journal*, 28, 117–138.
- Söderlund, M., & Rosengren, S. (2008). Revisiting the smiling service worker and customer satisfaction. *International Journal of Service Industry Management*, 19, 552–574.
- Soscia, I. (2007). Gratitude, delight, or guilt: the role of consumers' emotions in predicting postconsumption behaviors. *Psychology and Marketing*, 24, 871–894.
- Tsai, W., & Huang, Y. M. (2002). Mechanisms linking employee affecting delivery and

- customer behavioral intentions. *Journal of Applied Psychology*, 87, 1001–1008.
- Van Dolen, W., Lemmink, J., Mattsson, J., & Rhoen, I. (2001). Affective consumer responses in service encounters: the emotional content in narratives of critical incidents. *Journal of Economic Psychology*, 22, 359–376.
- Venkatesh, V. (2000). Determinants of perceived ease of use: integrating control, intrinsic motivation, and emotion into the technology acceptance model. *Information Systems Research*, 11, 342–365.
- Vilnai-Yavetz, I., & Rafaeli, A. (2006). Aesthetics and professionalism of virtual servicescapes. *Journal of Service Research*, 8, 245–259.
- Wong, A. (2004). The role of emotional satisfaction in service encounters. *Managing Service Quality: An International Journal*, 14, 365–376.
- Xie, C., Bagozzi, R. P., & Grønhaug, K. (2015). The role of moral emotions and individual differences in consumer responses to corporate green and non-green actions. *Journal of the Academy of Marketing Science*, 43, 333–356.
- Yim, C. K. (Bennett), Chan, K. W., & Lam, S. S. K. (2012). Do customers and employees enjoy service participation? Synergistic effects of self- and other-efficacy. *Journal of Marketing*, 76, 121–140.
- Yüksel, A. (2007). Tourist shopping habitat: effects on emotions, shopping value and behaviours. *Tourism Management*, 28, 58–69.

## Appendix B Coding of emotions and moderators

*Coding was done by the first author and two independent coders who were blind to the research question. The initial inter-rater reliability was substantial ( $\kappa = .678$ ) and all disagreements were subsequently discussed and resolved.*

| <b>Constructs</b>              | <b>Coded 1 in the following cases (0 otherwise)</b>  |                                                                                                                                                                                                                                                                                                                                        |
|--------------------------------|------------------------------------------------------|----------------------------------------------------------------------------------------------------------------------------------------------------------------------------------------------------------------------------------------------------------------------------------------------------------------------------------------|
| Emotions                       | Anger                                                | Anger, rage, irritation, annoyed, enraged, mad, upset, hate, hostile                                                                                                                                                                                                                                                                   |
|                                | Embarrassment                                        | Shame, ashamed, embarrassed, humiliated                                                                                                                                                                                                                                                                                                |
|                                | Fear                                                 | Fear, scared, afraid, panicky, frightened                                                                                                                                                                                                                                                                                              |
|                                | Guilt                                                | Guilt                                                                                                                                                                                                                                                                                                                                  |
|                                | Uneasiness                                           | Nervous, jittery, restless, worried, tense, anxious, discontented, unfulfilled, unsatisfied, unhappy, distress                                                                                                                                                                                                                         |
|                                | Sadness                                              | Sadness, depressed, miserable, despairing                                                                                                                                                                                                                                                                                              |
|                                | Gratitude                                            | Gratitude, appreciative                                                                                                                                                                                                                                                                                                                |
|                                | Happiness                                            | Joyful, happy, pleased, enjoyment, pleasure, cheerful, fun, amused                                                                                                                                                                                                                                                                     |
|                                | Love                                                 | Loving, affectionate, admiration, warm feeling                                                                                                                                                                                                                                                                                         |
|                                | Pride                                                | Pride                                                                                                                                                                                                                                                                                                                                  |
| Outcome variables              | Evaluation                                           | Satisfaction, service quality, company image, confirmation, relationship quality, hedonic shopping value, utilitarian shopping value, attitude toward service worker, attitude toward encounter, perceived quality, attitude toward company                                                                                            |
|                                | Purchase behavior                                    | Spending, purchase, repurchase intentions, loyalty, approach/avoidance, frequency of use intention, desire to stay, purchase intention, behavioral intentions                                                                                                                                                                          |
|                                | Sharing behavior                                     | Complaining, negative word-of-mouth, third-party complaining, positive word-of-mouth                                                                                                                                                                                                                                                   |
| Other moderators               | Interaction with employees                           | Interaction with an employee was explicitly described in a vignette or explicitly asked to recall                                                                                                                                                                                                                                      |
|                                | Service recovery                                     | Service recovery was explicitly described or asked to recall                                                                                                                                                                                                                                                                           |
|                                | B2B                                                  | B2B context was explicitly described or asked to recall                                                                                                                                                                                                                                                                                |
|                                | Product/service type: search                         | Car, bike, computer, electronics, headphones, mobile phones, skis, software, watch                                                                                                                                                                                                                                                     |
|                                | Product/service type: experience                     | Airline, online retailer, retail store, bar, bus service, café, chocolate tasting, cinema, concert, department store, dry cleaner, e-services, energy provider, fitness club, hair dresser, health club, insurance, hotels, karaoke, network provider, online dating, restaurant, social networking site, travel agency, wildlife park |
| Product/service type: credence | Banking, dentist, financial services, legal services |                                                                                                                                                                                                                                                                                                                                        |

## Appendix C

Omnibus tests of moderation per core affect and appraisal manifestation (absolute effect sizes)

| Appraisal manifestation | Interaction      |                           | Service recovery |         | B2B       |         | Product/service type |         |
|-------------------------|------------------|---------------------------|------------------|---------|-----------|---------|----------------------|---------|
|                         | Q (df)           | p value                   | Q (df)           | p value | Q (df)    | p value | Q (df)               | p value |
| Valence pos             | 0.017 (1)        | 0.897                     | 0.346 (1)        | 0.556   | 0.507 (1) | 0.477   | 1.692 (2)            | 0.429   |
| Valence neg             | 0.969 (1)        | 0.325                     | 1.792 (1)        | 0.191   | 2.013 (1) | 0.156   | 0.516 (2)            | 0.773   |
| Control 1               | 0.002 (1)        | 0.966                     | 0.240 (1)        | 0.624   | 1.702 (1) | 0.192   | 3.670 (1)            | 0.160   |
| Control 0               | 0.578 (1)        | 0.447                     | n/a              | n/a     | 0.343 (1) | 0.558   | 0.944 (2)            | 0.624   |
| Responsibility 1        | 1.710 (1)        | 0.191                     | 0.420 (1)        | 0.517   | 0.331 (1) | 0.565   | 0.449 (1)            | 0.799   |
| Responsibility 0        | 0.000 (1)        | 0.983                     | 0.182 (1)        | 0.670   | 2.020 (1) | 0.155   | 3.593 (2)            | 0.166   |
| Certainty 1             | 0.003 (1)        | 0.960                     | 0.045 (1)        | 0.831   | 0.160 (1) | 0.689   | 1.792 (2)            | 0.408   |
| Certainty 0             | 1.897 (1)        | 0.168                     | 0.545 (1)        | 0.461   | 2.316 (1) | 0.128   | 1.537 (2)            | 0.464   |
| Legitimacy 1            | 0.001 (1)        | 0.980                     | 0.040 (1)        | 0.841   | 0.437 (1) | 0.509   | 0.955 (2)            | 0.620   |
| <b>Legitimacy 0</b>     | <b>2.872 (1)</b> | <b>0.090</b> <sup>1</sup> | 0.004 (1)        | 0.950   | 0.426 (1) | 0.514   | 0.036 (1)            | 0.849   |
| Arousal -1              | 1.537 (1)        | 0.215                     | 0.065 (1)        | 0.799   | 0.311 (1) | 0.577   | 0.338 (1)            | 0.844   |
| Arousal 0               | 0.009 (1)        | 0.926                     | 0.108 (1)        | 0.742   | 0.002 (1) | 0.961   | 2.418 (2)            | 0.298   |
| Arousal 1               | 0.136 (1)        | 0.712                     | 0.487 (1)        | 0.485   | 0.312 (1) | 0.577   | 2.001 (2)            | 0.368   |

n/a: not applicable due to lack of effect sizes; **bold**: (marginally) significant moderation effects;

<sup>1</sup> Emotions that are characterized by a person's moral wrongdoing (legitimacy = 0) have significantly stronger effects on outcome variables for interactions with employees (0.410; 95% CI: 0.173; 0.602) as compared to other interactions (0.169; 95% CI: -0.005; 0.334).

## Appendix D

Omnibus tests of moderation (methodological variables)

| Emotion       | Vignette study |         | Field study      |              | Manipulation emotion |              | Experimental study |              | Student sample   |              |
|---------------|----------------|---------|------------------|--------------|----------------------|--------------|--------------------|--------------|------------------|--------------|
|               | Q (df)         | P value | Q (df)           | P value      | Q (df)               | P value      | Q (df)             | P value      | Q (df)           | P value      |
| Gratitude     | 0.506 (1)      | 0.477   | 0.521 (1)        | 0.470        | n/a                  | n/a          | 0.680 (1)          | 0.410        | 1.380 (1)        | 0.240        |
| Love          | 0.217 (1)      | 0.641   | 0.245 (1)        | 0.620        | n/a                  | n/a          | 0.217 (1)          | 0.641        | 0.398 (1)        | 0.528        |
| Happiness     | 0.136 (1)      | 0.712   | 1.472 (1)        | 0.225        | 0.518 (1)            | 0.472        | 0.007 (1)          | 0.932        | 0.148 (1)        | 0.700        |
| Pride         | 1.456 (1)      | 0.228   | 1.194 (1)        | 0.275        | <b>7.838 (1)</b>     | <b>0.005</b> | 1.456 (1)          | 0.228        | 0.968 (1)        | 0.325        |
| Guilt         | 1.412 (1)      | 0.235   | n/a              | n/a          | 0.002 (1)            | 0.962        | 2.615 (1)          | 0.106        | 0.009 (1)        | 0.924        |
| Fear          | 0.035 (1)      | 0.852   | 0.000 (1)        | 0.987        | 2.144 (1)            | 0.143        | 0.112 (1)          | 0.738        | 0.314 (1)        | 0.575        |
| Embarrassment | 0.151 (1)      | 0.698   | 0.215 (1)        | 0.643        | n/a                  | n/a          | 0.355 (1)          | 0.552        | 0.003 (1)        | 0.956        |
| Uneasiness    | 2.056 (1)      | 0.152   | 2.261 (1)        | 0.133        | 0.843 (1)            | 0.359        | <b>2.758 (1)</b>   | <b>0.097</b> | <b>3.074 (1)</b> | <b>0.080</b> |
| Sadness       | 0.745 (1)      | 0.388   | 0.009 (1)        | 0.924        | 2.181 (1)            | 0.140        | 0.145 (1)          | 0.703        | 0.016 (1)        | 0.899        |
| Anger         | 0.097 (1)      | 0.755   | <b>2.740 (1)</b> | <b>0.098</b> | 0.001 (1)            | 0.979        | 0.026 (1)          | 0.872        | 0.162 (1)        | 0.687        |

n/a: not applicable due to lack of effect sizes; **bold**: (marginally) significant moderation effects.

| Emotion       | Emotions bipolar vs. unipolar |         | Emotions frequency vs. intensity |         | High impact journals |              |
|---------------|-------------------------------|---------|----------------------------------|---------|----------------------|--------------|
|               | Q (df)                        | P value | Q (df)                           | P value | Q (df)               | P value      |
| Gratitude     | n/a                           | n/a     | n/a                              | n/a     | <b>6.409 (1)</b>     | <b>0.011</b> |
| Love          | n/a                           | n/a     | n/a                              | n/a     | 0.262 (1)            | 0.609        |
| Happiness     | 0.188 (1)                     | 0.665   | 0.116 (1)                        | 0.734   | 0.942 (1)            | 0.332        |
| Pride         | n/a                           | n/a     | n/a                              | n/a     | 1.858 (1)            | 0.173        |
| Guilt         | n/a                           | n/a     | 0.926 (1)                        | 0.336   | 0.323 (1)            | 0.570        |
| Fear          | n/a                           | n/a     | 0.454 (1)                        | 0.500   | 0.006 (1)            | 0.936        |
| Embarrassment | n/a                           | n/a     | 0.020 (1)                        | 0.888   | 0.013 (1)            | 0.908        |
| Uneasiness    | 0.446 (1)                     | 0.504   | 0.036 (1)                        | 0.850   | 0.232 (1)            | 0.630        |
| Sadness       | 1.204 (1)                     | 0.272   | 0.191 (1)                        | 0.662   | 0.026 (1)            | 0.871        |
| Anger         | 0.171 (1)                     | 0.679   | 0.115 (1)                        | 0.735   | 0.093 (1)            | 0.761        |

## Appendix E

Influence of methodological moderators on discrete emotions' effects on all outcome variables (subgroup analyses of moderators separately)

| Emotion       | Vignette study |                   |         |     |                |         | Field study |                |         |     |                |         |
|---------------|----------------|-------------------|---------|-----|----------------|---------|-------------|----------------|---------|-----|----------------|---------|
|               | k              | Estimate vignette | p value | k   | Estimate other | p value | k           | Estimate field | p value | k   | Estimate other | p value |
| Gratitude     | 10             |                   |         | 31  |                |         | 4           |                |         | 37  |                |         |
| Love          | 4              |                   |         | 37  |                |         | 2           |                |         | 39  |                |         |
| Happiness     | 36             |                   |         | 248 |                |         | 66          |                |         | 218 |                |         |
| Pride         | 19             |                   |         | 16  |                |         | 11          |                |         | 24  |                |         |
| Guilt         | 17             |                   |         | 21  |                |         | 9           |                |         | 29  |                |         |
| Fear          | 15             |                   |         | 47  |                |         | 21          |                |         | 41  |                |         |
| Embarrassment | 24             |                   |         | 26  |                |         | 16          |                |         | 34  |                |         |
| Uneasiness    | 65             |                   |         | 90  |                |         | 70          |                |         | 85  |                |         |
| Sadness       | 43             |                   |         | 80  |                |         | 45          |                |         | 78  |                |         |
| Anger         | 75             |                   |         | 131 |                |         | 61          | -0.437         | <.001   | 145 | -0.236         | 0.020   |

  

| Emotion       | Manipulation emotion |                      |         |     |                |         | Experimental study |                     |         |     |                |         |
|---------------|----------------------|----------------------|---------|-----|----------------|---------|--------------------|---------------------|---------|-----|----------------|---------|
|               | k                    | Estimate manipulated | p value | k   | Estimate other | p value | k                  | Estimate experiment | p value | k   | Estimate other | p value |
| Gratitude     | 0                    |                      |         | 41  |                |         | 11                 |                     |         | 30  |                |         |
| Love          | 0                    |                      |         | 41  |                |         | 4                  |                     |         | 37  |                |         |
| Happiness     | 4                    |                      |         | 280 |                |         | 45                 |                     |         | 239 |                |         |
| Pride         | 12                   | -0.024               | 0.755   | 23  | 0.249          | <.001   | 19                 |                     |         | 16  |                |         |
| Guilt         | 15                   |                      |         | 23  |                |         | 24                 |                     |         | 14  |                |         |
| Fear          | 5                    |                      |         | 57  |                |         | 20                 |                     |         | 42  |                |         |
| Embarrassment | 0                    |                      |         | 50  |                |         | 24                 |                     |         | 26  |                |         |
| Uneasiness    | 1                    |                      |         | 154 |                |         | 75                 | 0.037               | 0.810   | 80  | -0.242         | <.001   |
| Sadness       | 3                    |                      |         | 120 |                |         | 57                 |                     |         | 66  |                |         |
| Anger         | 27                   |                      |         | 179 |                |         | 90                 |                     |         | 116 |                |         |

| Emotion       | Student sample |                  |         |     |                |         | Emotions measured bipolar versus unipolar |                  |         |     |                   |         |
|---------------|----------------|------------------|---------|-----|----------------|---------|-------------------------------------------|------------------|---------|-----|-------------------|---------|
|               | k              | Estimate student | p value | k   | Estimate other | p value | k                                         | Estimate bipolar | p value | k   | Estimate unipolar | p value |
| Gratitude     | 9              |                  |         | 32  |                |         | 0                                         |                  |         | 41  |                   |         |
| Love          | 6              |                  |         | 35  |                |         | 0                                         |                  |         | 41  |                   |         |
| Happiness     | 69             |                  |         | 215 |                |         | 21                                        |                  |         | 263 |                   |         |
| Pride         | 21             |                  |         | 14  |                |         | 0                                         |                  |         | 35  |                   |         |
| Guilt         | 18             |                  |         | 20  |                |         | 0                                         |                  |         | 38  |                   |         |
| Fear          | 22             |                  |         | 40  |                |         | 0                                         |                  |         | 62  |                   |         |
| Embarrassment | 30             |                  |         | 20  |                |         | 0                                         |                  |         | 50  |                   |         |
| Uneasiness    | 76             | 0.088            | 0.356   | 79  | -0.171         | 0.130   | 52                                        |                  |         | 103 |                   |         |
| Sadness       | 62             |                  |         | 61  |                |         | 35                                        |                  |         | 88  |                   |         |
| Anger         | 77             |                  |         | 129 |                |         | 11                                        |                  |         | 195 |                   |         |

| Emotion       | Emotion frequency versus intensity measure |                    |         |     |                    |         | High impact journals (impact factor $\geq 4$ ; mean split) |                      |         |     |                     |         |
|---------------|--------------------------------------------|--------------------|---------|-----|--------------------|---------|------------------------------------------------------------|----------------------|---------|-----|---------------------|---------|
|               | k                                          | Estimate frequency | p value | k   | Estimate intensity | p value | k                                                          | Estimate high impact | p value | k   | Estimate low impact | p value |
| Gratitude     | 0                                          |                    |         | 41  |                    |         | 36                                                         | 0.582                | 0.016   | 5   | 0.919               | <.001   |
| Love          | 0                                          |                    |         | 41  |                    |         | 34                                                         |                      |         | 7   |                     |         |
| Happiness     | 28                                         |                    |         | 256 |                    |         | 184                                                        |                      |         | 100 |                     |         |
| Pride         | 0                                          |                    |         | 35  |                    |         | 18                                                         |                      |         | 17  |                     |         |
| Guilt         | 4                                          |                    |         | 34  |                    |         | 16                                                         |                      |         | 22  |                     |         |
| Fear          | 2                                          |                    |         | 60  |                    |         | 36                                                         |                      |         | 26  |                     |         |
| Embarrassment | 2                                          |                    |         | 48  |                    |         | 9                                                          |                      |         | 41  |                     |         |
| Uneasiness    | 8                                          |                    |         | 147 |                    |         | 68                                                         |                      |         | 87  |                     |         |
| Sadness       | 12                                         |                    |         | 111 |                    |         | 55                                                         |                      |         | 78  |                     |         |
| Anger         | 10                                         |                    |         | 196 |                    |         | 144                                                        |                      |         | 62  |                     |         |
